# Supplementary material
Source: Springer Nature journal article supplement (https://www.springermedizin.de/resource/supplementary/13019_2009_212_MOESM7_ESM.pdf/9638084)

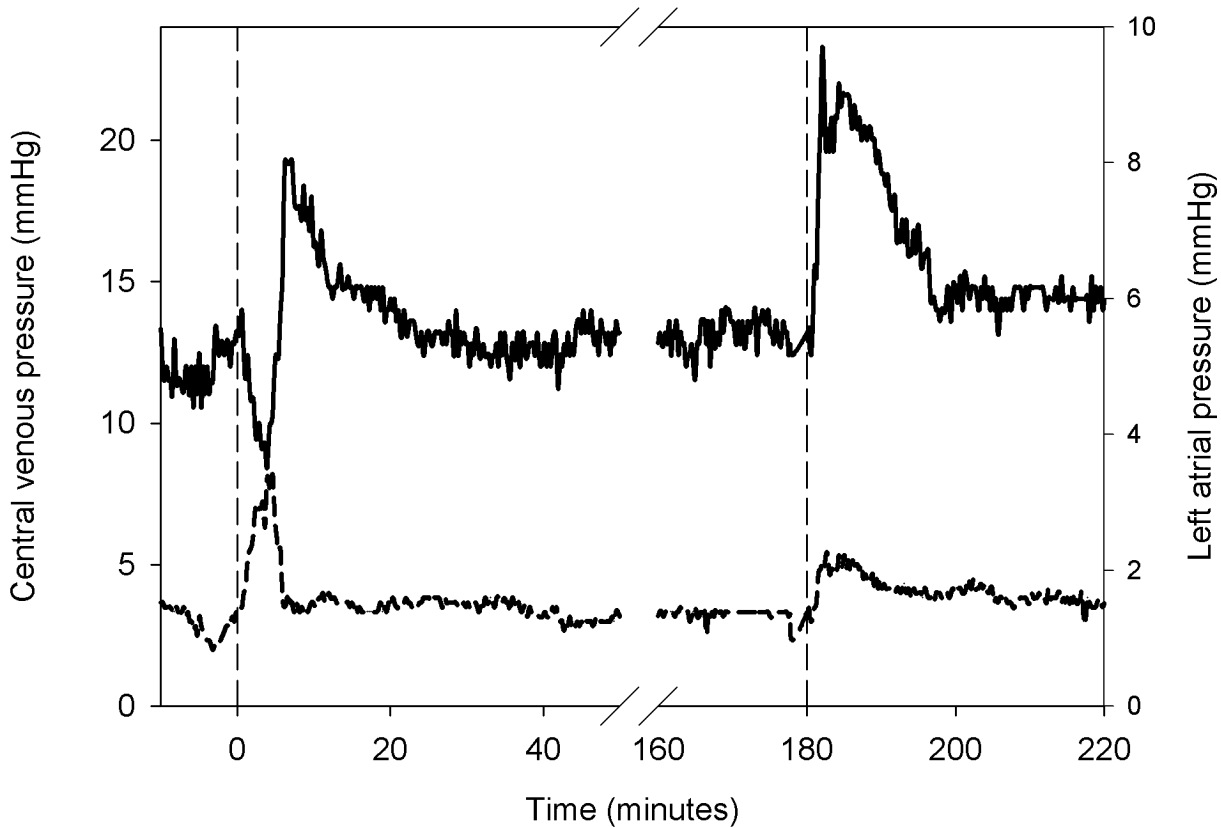

Supplement: MOESM7 [file 9638084]
